# Supplementary material
Source: MDPI journal article supplement (https://www.mdpi.com/2073-4441/13/16/2256)
Supplement: s1 [file s1]

## Article

# Ecological Risk Due to Heavy Metal Contamination in Sediment and Water of Natural Wetlands with Tourist Influence in the Central Region of Peru

María Custodio <sup>1,\*</sup>, Anthony Fow <sup>2</sup>, Fernán Chanamé <sup>1</sup>, Edith Orellana-Mendoza <sup>1</sup>, Richard Peñaloza <sup>1</sup>, Juan C. Alvarado <sup>3</sup>, Deyvis Cano <sup>1</sup> and Samuel Pizarro <sup>1</sup>

## Supplementary Materials

**Table S1.** Description of individual indices, methods and categorizations used in sediment assessment.

| Index                                     | Application                                                                                                                                                                                                                   | Method                                                                                                                                                                                                                                                                                                                                                                                                                 | Categorization                                                                                                                                                                                                                                                                                                                  | References |
|-------------------------------------------|-------------------------------------------------------------------------------------------------------------------------------------------------------------------------------------------------------------------------------|------------------------------------------------------------------------------------------------------------------------------------------------------------------------------------------------------------------------------------------------------------------------------------------------------------------------------------------------------------------------------------------------------------------------|---------------------------------------------------------------------------------------------------------------------------------------------------------------------------------------------------------------------------------------------------------------------------------------------------------------------------------|------------|
| Contamination factor (Cf)                 | The relationship between the concentration of each metal in the sediment and the background value is applied to quantify the metal contamination status of the sediment, helping to describe the individual toxic substances. | $C = \frac{C_m \text{ sample}}{C_m \text{ background}}$<br>C <sub>m</sub> sample : Concentration of metal in sediment<br>C <sub>m</sub> background: Concentration of metal in Upper Continental Crust                                                                                                                                                                                                                  | < 1; Low CF<br>1–3; Moderate CF<br>3–6; Considerable CF<br>≥ 6; Very high CF                                                                                                                                                                                                                                                    | [1,2]      |
| Enrichment factor* (EF)                   | A tool to estimating the anthropogenic impact of the metals in sediments. This method usually uses the Iron or Aluminum as a tracer or proxy to distinguish or normalize natural from anthropogenic components in the sample. | $EF = \frac{(C_m \text{ sample} \times C_{Fe} \text{ background})}{(C_m \text{ background} \times C_{Fe} \text{ sample})}$<br>C <sub>m</sub> sample : Concentration of metal in sediment<br>C <sub>m</sub> background: Concentration of metal in Upper Continental Crust<br>C <sub>Fe</sub> sample : Concentration of iron in sediment<br>C <sub>Fe</sub> background: Concentration of iron in Upper Continental Crust | < 1; No enrichment<br>1–3; Minor enrichment<br>3–5; Moderate enrichment<br>5–10; Moderately severe enrichment<br>10–25; Severe enrichment<br>25–50; Very severe enrichment<br>>50; Extremely severe enrichment.                                                                                                                 | [2–4]      |
| Geoaccumulation index (I <sub>geo</sub> ) | Used to determine the difference in concentrations between samples and the background values that exist naturally in the continental crust. This index assess the pollution levels in sediment to each metal evaluated.       | $I_{geo} = \log_2 \frac{C_n}{1.5 \times B_n}$<br>C <sub>n</sub> = Concentration of metal in sediment<br>B <sub>n</sub> = Concentration of metal in Upper Continental Crust<br>1.5 = Factor to minimize the effect of possible variations in the background values                                                                                                                                                      | ≤ 0; class 0 = Uncontaminated<br>0–1; class 1 = Uncontaminated to moderately contaminated<br>1–2; class 2 = Moderately contaminated<br>2–3; class 3 = Moderately to strongly contaminated<br>3–4; class 4 = Strongly contaminated<br>4–5; class 5 = Strongly to extremely contaminated<br>> 5; class 6 = Extremely contaminated | [5,6]      |

\*The Iron was used as a proxy because we had the data of this element and it was used in other researches with similar geographical conditions as [7–10].

**Table S2.** Description of complex indices, methods and categorizations used in sediment assessment.

| Index                               | Application                                                                                                                                                                                                                                                                                                                                 | Method                                                                                                                                                                                                                        | Categorization                                                                                                                                                                                                                                                                                                                                | References |
|-------------------------------------|---------------------------------------------------------------------------------------------------------------------------------------------------------------------------------------------------------------------------------------------------------------------------------------------------------------------------------------------|-------------------------------------------------------------------------------------------------------------------------------------------------------------------------------------------------------------------------------|-----------------------------------------------------------------------------------------------------------------------------------------------------------------------------------------------------------------------------------------------------------------------------------------------------------------------------------------------|------------|
| Pollution Load Index (PLI)          | Provide some understanding to the public of the degree of contamination in sediments. Another way to determinate the deterioration of the environment as a result of the accumulation of toxic metals.                                                                                                                                      | $PLI = (CF_1 \times CF_2 \times CF_3 \times \dots CF_n)^{1/n}$ $CF_n: \text{Contamination factor of each metal}$ $n: \text{Number of metals}$                                                                                 | $< 1$ ; Uncontaminated<br>$= 1$ ; Slightly contaminated<br>$> 1$ ; Environment deterioration                                                                                                                                                                                                                                                  | [11,12]    |
| Contamination Modified Degree (mCd) | Assessment of overall degree of contamination of the elements studied. Using this generalized formula to calculate the mCd, from the original Cd, allows the incorporation of as many metals as the study may include.                                                                                                                      | $mCd = \frac{\sum_{i=1}^n C_f^i}{n}$ $C_f: \text{Contamination factor}$ $i: \text{ith metal}$ $n: \text{Number of metals}$                                                                                                    | $< 1.5$ ; Uncontaminated to very low degree of contamination<br>$1.5-2$ ; Low degree of contamination<br>$2-4$ ; Moderate degree of contamination<br>$4-8$ ; High degree of contamination<br>$8-16$ ; Very high degree of contamination<br>$16-32$ ; Extremely high degree of contamination<br>$\geq 32$ ; Ultra high degree of contamination | [3,6]      |
| Potential Ecological Risk (Ri)      | Assess the integrated potential ecological risk from all heavy metals measured in sediments, on ecosystem organisms. Since its model includes the ecological risk and the biological toxic factor of each metal.                                                                                                                            | $E_r^i = T_r^i \times C_f^i$ $Ri = \sum_{i=1}^n E_r^i$ $E_r: \text{Ecological risk index of each metal}$ $T_r: \text{Biological toxic factor of each metal}$ $i: \text{ith metal}$                                            | $< 95$ ; Low potential ecological risk<br>$95-190$ ; Moderate ecological risk<br>$190-380$ ; Considerable ecological risk<br>$> 380$ ; Very high ecological risk                                                                                                                                                                              | [1,13]     |
| Site Rank Index (SRI)*              | Allows a better understanding of the sediment pollution status with respect to the environment under study, since it compares the pollution level of sampling sites with respect to the concentrations of elements analyzed under same metrics avoiding the comparison in different classifications of each pollution index (CF, Igeo, EF). | $W = \frac{\sum n_i}{\sum i}$ $SRI = \frac{W}{S} \times 100$ $S: \text{Number of sampling stations}$ $n: \text{Pollution rank of the site in ascending order (to each value used: Igeo, RI, EF, etc.)}$ $i: \text{ith metal}$ | $SRI < \text{median} - SD$ ; Low pollution<br>$\text{median} - SD < SRI < \text{median}$ ; Moderate pollution<br>$\text{median} < SRI < \text{median} + SD$ ; High pollution<br>$\text{median} + SD < SRI$ ; Severe pollution                                                                                                                 | [4,14]     |

\*The SRI was also applied to the metal concentration values of water samples [14].

**Table S3.** Metal concentration in sediments and surface water of samples collected in Tragadero lagoon.

| Sample | Metal concentration in sediments (mg kg <sup>-1</sup> ) |       |          |       | Metal concentration in water (mg L <sup>-1</sup> ) |       |       |       |
|--------|---------------------------------------------------------|-------|----------|-------|----------------------------------------------------|-------|-------|-------|
|        | Pb                                                      | Zn    | Fe       | As    | Pb                                                 | Zn    | Fe    | As    |
| 1      | 59.52                                                   | 71.66 | 20795.30 | 20.23 | 0.026                                              | 0.064 | 0.039 | 0.025 |
| 2      | 55.43                                                   | 84.64 | 21137.20 | 24.79 | 0.024                                              | 0.065 | 0.038 | 0.025 |
| 3      | 53.45                                                   | 82.50 | 21431.50 | 27.09 | 0.021                                              | 0.069 | 0.033 | 0.020 |
| 4      | 57.87                                                   | 80.86 | 20562.10 | 17.54 | 0.021                                              | 0.080 | 0.042 | 0.019 |
| 5      | 55.50                                                   | 79.02 | 17618.70 | 17.83 | 0.023                                              | 0.081 | 0.043 | 0.021 |
| 6      | 52.36                                                   | 65.42 | 20578.50 | 25.14 | 0.025                                              | 0.074 | 0.039 | 0.023 |
| 7      | 54.47                                                   | 74.14 | 21006.30 | 19.77 | 0.024                                              | 0.074 | 0.042 | 0.024 |
| 8      | 53.31                                                   | 76.44 | 12406.60 | 18.62 | 0.016                                              | 0.074 | 0.034 | 0.019 |
| 9      | 53.81                                                   | 82.66 | 11575.20 | 24.57 | 0.019                                              | 0.076 | 0.028 | 0.018 |
| 10     | 56.21                                                   | 72.18 | 20767.10 | 28.83 | 0.014                                              | 0.076 | 0.042 | 0.024 |
| 11     | 53.46                                                   | 67.92 | 20493.10 | 26.89 | 0.015                                              | 0.077 | 0.034 | 0.021 |
| 12     | 47.67                                                   | 66.44 | 20277.80 | 16.21 | 0.013                                              | 0.077 | 0.041 | 0.024 |
| 13     | 44.64                                                   | 77.54 | 16677.60 | 19.65 | 0.017                                              | 0.078 | 0.046 | 0.021 |
| 14     | 41.99                                                   | 68.38 | 11232.90 | 24.68 | 0.012                                              | 0.080 | 0.038 | 0.020 |
| 15     | 48.56                                                   | 63.24 | 20354.60 | 22.40 | 0.012                                              | 0.070 | 0.034 | 0.019 |
| 16     | 45.48                                                   | 73.64 | 11139.10 | 24.37 | 0.009                                              | 0.073 | 0.042 | 0.022 |
| 17     | 48.02                                                   | 67.14 | 17629.80 | 24.19 | 0.017                                              | 0.087 | 0.034 | 0.025 |
| 18     | 43.51                                                   | 69.78 | 11315.90 | 22.40 | 0.019                                              | 0.087 | 0.043 | 0.020 |
| 19     | 41.52                                                   | 66.02 | 10659.20 | 22.16 | 0.018                                              | 0.087 | 0.034 | 0.024 |
| 20     | 46.12                                                   | 65.28 | 20058.60 | 28.38 | 0.022                                              | 0.089 | 0.038 | 0.023 |
| 21     | 48.94                                                   | 68.74 | 11555.20 | 25.22 | 0.021                                              | 0.089 | 0.046 | 0.020 |
| 22     | 45.62                                                   | 64.06 | 21649.40 | 20.23 | 0.021                                              | 0.091 | 0.038 | 0.021 |
| 23     | 43.21                                                   | 67.88 | 11298.60 | 28.27 | 0.023                                              | 0.092 | 0.042 | 0.021 |
| 24     | 42.35                                                   | 62.62 | 19871.10 | 22.27 | 0.025                                              | 0.092 | 0.039 | 0.025 |

**Table S4.** Metal concentration in sediments and surface water of samples collected in Paca lagoon.

| Sample | Metal concentration in sediments (mg kg <sup>-1</sup> ) |        |          |       | Metal concentration in water (mg L <sup>-1</sup> ) |       |       |       |
|--------|---------------------------------------------------------|--------|----------|-------|----------------------------------------------------|-------|-------|-------|
|        | Pb                                                      | Zn     | Fe       | As    | Pb                                                 | Zn    | Fe    | As    |
| 1      | 53.94                                                   | 105.52 | 10107.40 | 10.79 | 0.011                                              | 0.074 | 0.019 | 0.004 |
| 2      | 42.19                                                   | 104.90 | 9625.80  | 12.83 | 0.010                                              | 0.074 | 0.019 | 0.003 |
| 3      | 42.21                                                   | 102.90 | 9725.80  | 10.59 | 0.012                                              | 0.074 | 0.023 | 0.004 |
| 4      | 45.88                                                   | 102.56 | 9342.20  | 14.63 | 0.016                                              | 0.074 | 0.019 | 0.003 |
| 5      | 44.23                                                   | 94.64  | 8772.30  | 15.14 | 0.011                                              | 0.074 | 0.023 | 0.004 |
| 6      | 50.33                                                   | 94.34  | 10501.40 | 16.86 | 0.016                                              | 0.075 | 0.023 | 0.006 |
| 7      | 52.22                                                   | 93.72  | 9245.70  | 15.03 | 0.009                                              | 0.075 | 0.023 | 0.003 |
| 8      | 53.96                                                   | 92.68  | 9656.20  | 14.52 | 0.013                                              | 0.075 | 0.023 | 0.004 |
| 9      | 46.73                                                   | 92.68  | 8253.60  | 14.74 | 0.011                                              | 0.080 | 0.023 | 0.004 |
| 10     | 46.11                                                   | 92.58  | 8642.50  | 15.22 | 0.012                                              | 0.080 | 0.023 | 0.006 |
| 11     | 45.92                                                   | 84.18  | 10088.90 | 10.74 | 0.014                                              | 0.080 | 0.019 | 0.004 |
| 12     | 45.19                                                   | 82.24  | 8834.20  | 12.49 | 0.010                                              | 0.082 | 0.018 | 0.006 |
| 13     | 45.23                                                   | 79.76  | 9154.20  | 12.76 | 0.011                                              | 0.082 | 0.023 | 0.004 |
| 14     | 47.01                                                   | 79.68  | 9911.80  | 10.63 | 0.013                                              | 0.082 | 0.023 | 0.006 |
| 15     | 35.56                                                   | 78.58  | 9844.90  | 17.53 | 0.012                                              | 0.083 | 0.023 | 0.004 |
| 16     | 42.35                                                   | 78.38  | 10479.10 | 14.82 | 0.010                                              | 0.083 | 0.019 | 0.003 |
| 17     | 44.21                                                   | 77.90  | 7784.20  | 13.70 | 0.014                                              | 0.083 | 0.023 | 0.004 |
| 18     | 44.87                                                   | 75.82  | 9322.30  | 10.35 | 0.013                                              | 0.084 | 0.024 | 0.003 |
| 19     | 47.94                                                   | 75.76  | 9450.50  | 13.70 | 0.007                                              | 0.084 | 0.023 | 0.004 |
| 20     | 41.78                                                   | 75.66  | 10643.90 | 12.68 | 0.010                                              | 0.084 | 0.019 | 0.004 |
| 21     | 46.65                                                   | 74.38  | 9931.20  | 13.76 | 0.013                                              | 0.084 | 0.018 | 0.004 |
| 22     | 47.78                                                   | 68.72  | 9753.80  | 14.82 | 0.014                                              | 0.085 | 0.023 | 0.002 |
| 23     | 41.89                                                   | 68.58  | 8791.40  | 14.92 | 0.011                                              | 0.085 | 0.023 | 0.004 |
| 24     | 44.96                                                   | 67.62  | 10875.00 | 14.82 | 0.015                                              | 0.086 | 0.023 | 0.006 |

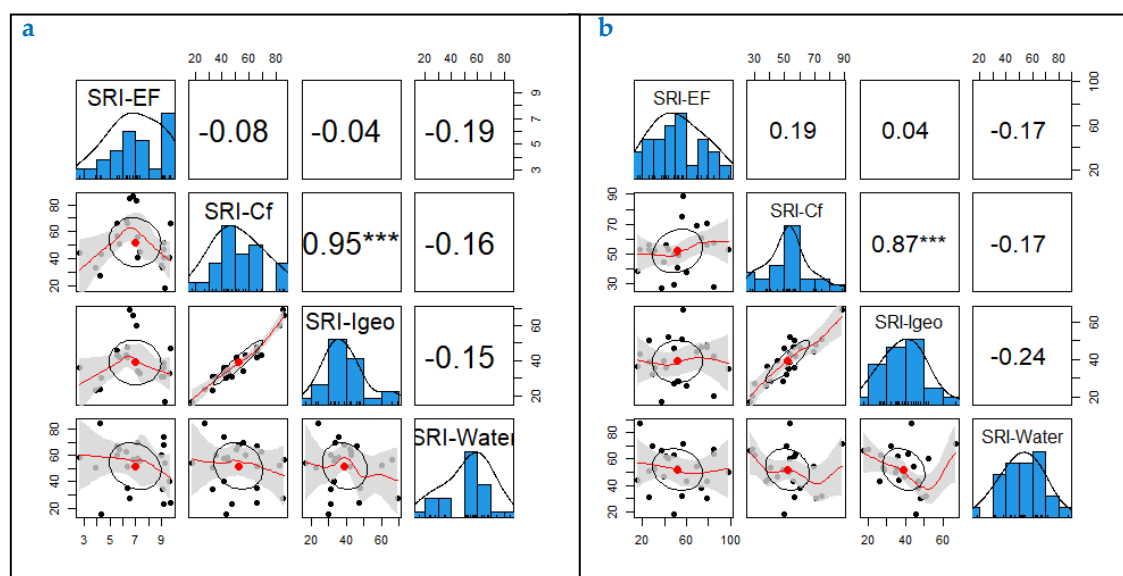

**Figure S1.** Correlation matrix of SRI calculated from each individual index and metal concentration in water (a: Tragadero lagoon; b: Paca lagoon) (\*\*\*: High correlation degree).

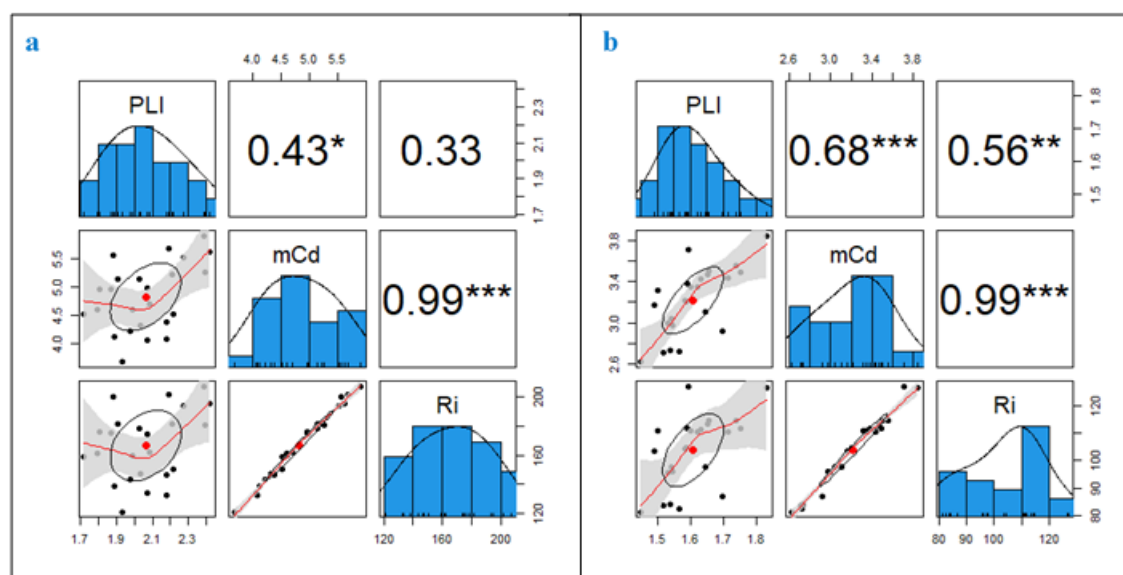

**Figure S2.** Correlation matrix of PLI, mCd and Ri calculated from sediment samples (a: Tragadero lagoon; b: Paca lagoon) (\*\*\*: High correlation degree, \*\*: Medium correlation degree, \*: Low correlation degree).

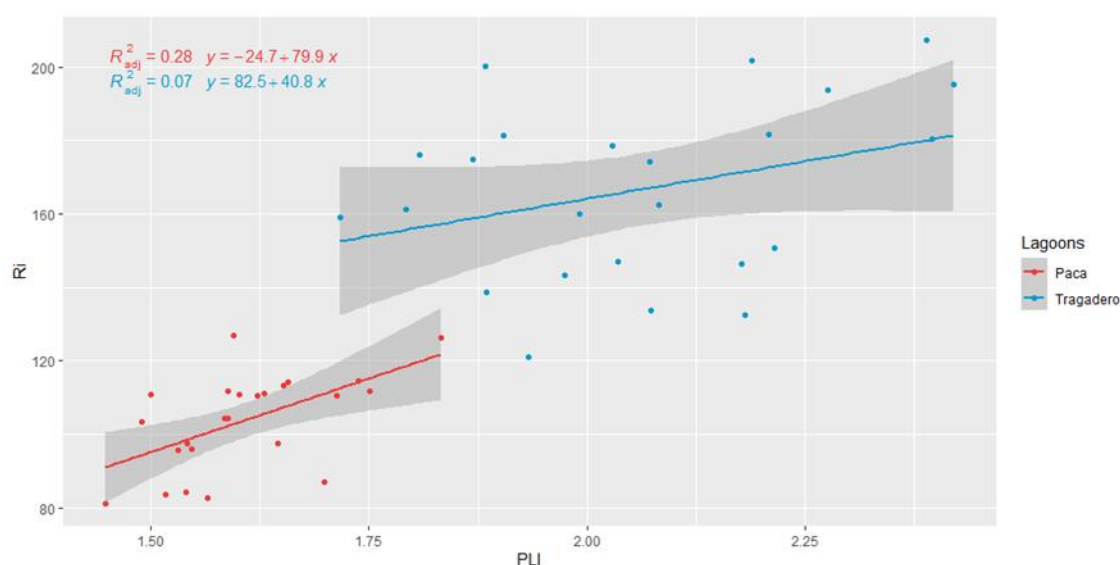

Figure S3. Linear regression between PLI and Ri values of the lagoons.

## References

- Hakanson, L. An Ecological Risk Index for Aquatic Pollution Control – A Sedimentological Approach. *Water Res.* **1980**, *14*, 975–1001, doi:10.1016/0043-1354(80)90143-8.
- El-Amier, Y.A.; Elnaggar, A.A.; El-Alfy, M.A. Evaluation and mapping spatial distribution of bottom sediment heavy metal contamination in Burullus Lake, Egypt. *Egypt. J. Basic Appl. Sci.* **2017**, *4*, 55–66, doi:10.1016/j.ejbas.2016.09.005.
- Abraham, G.M.S.; Parker, R.J. Assessment of heavy metal enrichment factors and the degree of contamination in marine sediments from Tamaki Estuary, Auckland, New Zealand. *Environ. Monit. Assess.* **2008**, *136*, 227–238, doi:10.1007/s10661-007-9678-2.
- Omwene, P.I.; Öncel, M.S.; Çelen, M.; Kobya, M. Heavy metal pollution and spatial distribution in surface sediments of Mustafakemalpaşa stream located in the world's largest borate basin (Turkey). *Chemosphere* **2018**, *208*, 782–792, doi:10.1016/j.chemosphere.2018.06.031.
- Müller, G. Heavy Metals in the Sediment of the Rhine-Changes Seitt. *Umschau in Wiss. Und Tech.* **1979**, *79*, 778–783.
- Kowalska, J.B.; Mazurek, R.; Gąsiorek, M.; Zaleski, T. Pollution indices as useful tools for the comprehensive evaluation of the degree of soil contamination—A review. *Environ. Geochem. Health* **2018**, *40*, 2395–2420, doi:10.1007/s10653-018-0106-z.
- Barbieri, M. The Importance of Enrichment Factor (EF) and Geoaccumulation Index (Igeo) to Evaluate the Soil Contamination. *J. Geol. Geophys.* **2016**, *5*, 1–4, doi:10.4172/2381-8719.1000237.
- Fernández Severini, M.D.; Carbone, M.E.; Villagran, D.M.; Marcovecchio, J.E. Toxic metals in a highly urbanized industry-impacted estuary (Bahia Blanca Estuary, Argentina): spatio-temporal analysis based on GIS. *Environ. Earth Sci.* **2018**, *77*, 0, doi:10.1007/s12665-018-7565-5.
- Fuentes-Hernández, M.V.; Sanguinetti-Gamboa, O.A.; Rojas De Astudillo, L.L. Evaluación del riesgo ambiental de metales pesados en los sedimentos superficiales del saco del golfo de Cariaco. *Rev. Int. Contam. Ambient.* **2019**, *35*, 101–114, doi:10.20937/RICA.2019.35.01.07.
- Juárez, P. del A.; Lugo de la Fuente, J.; Vaca Paulín, R. Determinación de factores de enriquecimiento y geoacumulación de Cd, Cr, Cu, Ni, Pb, y Zn. *Cienc. Ergo Sum* **2005**, *12*, 155–161.
- Mohiuddin, K.M.; Ogawa, Y.; Zakir, H.M.; Otomo, K.; Shikazono, N. Heavy metals contamination in water and sediments of an urban river in a developing country. *Int. J. Environ. Sci. Tech.* **2011**, *8*, 723–736.
- Tomlinson, D.L.; Wilson, J.G.; Harris, C.R.; Jeffrey, D.W. Problems in the assessment of heavy-metal levels in estuaries and the formation of a pollution index. *Helgoländer Meeresuntersuchungen* **1980**, *33*, 566–575, doi:10.1007/BF02414780.
- Ranjbar Jafarabadi, A.; Mitra, S.; Raudonytė-Svirbutavičienė, E.; Riyahi Bakhtiari, A. Large-scale evaluation of deposition, bio-availability and ecological risks of the potentially toxic metals in the sediment cores of the hotspot coral reef ecosystems (Persian Gulf, Iran). *J. Hazard. Mater.* **2020**, *400*, 122988, doi:10.1016/j.jhazmat.2020.122988.
- Zhang, H.; Zeng, H.; Jiang, Y.; Xie, Z.; Xu, X.; Ding, M.; Wang, P. Using the compound system to synthetically evaluate the enrichment of heavy metal(loid)s in a subtropical basin, China. *Environ. Pollut.* **2020**, *256*, 113396, doi:10.1016/j.envpol.2019.113396.
